# Supplementary material for: Inactivation of L. monocytogenes and S. typhimurium Biofilms by Means of an Air-Based Cold Atmospheric Plasma (CAP) System
Source: PubMed Central journal article supplement (PMC7074369; doi:10.3390/foods9020157), 2020-02-06

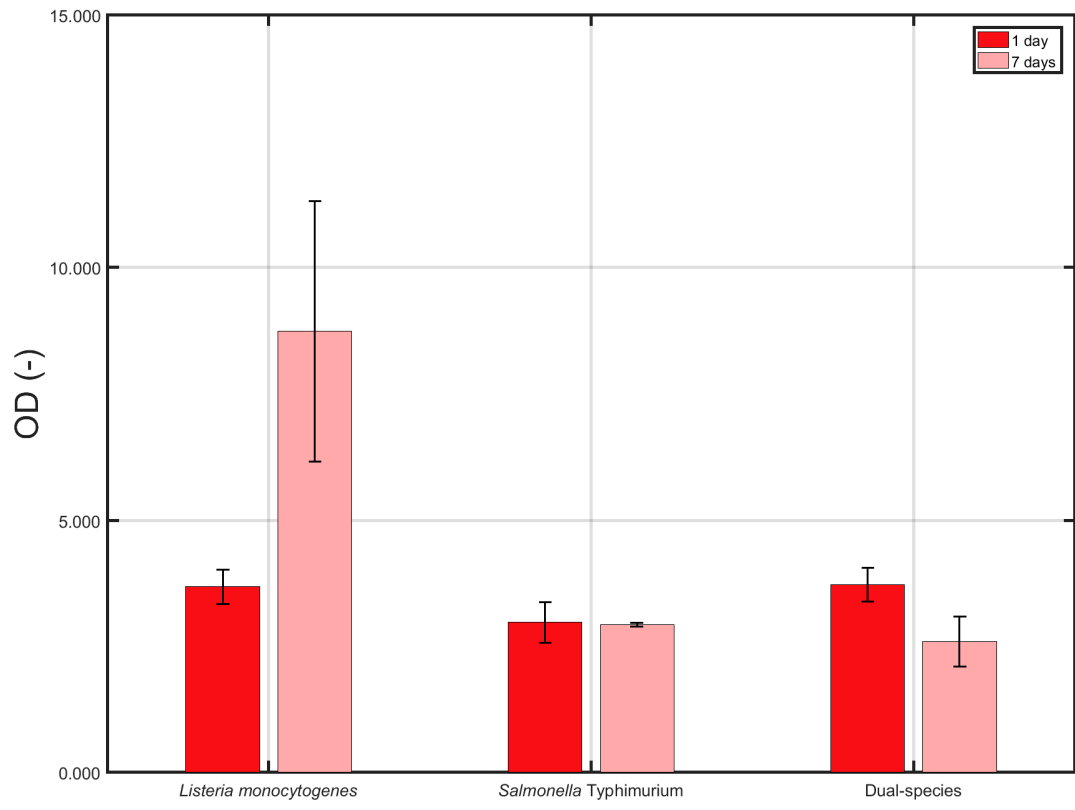

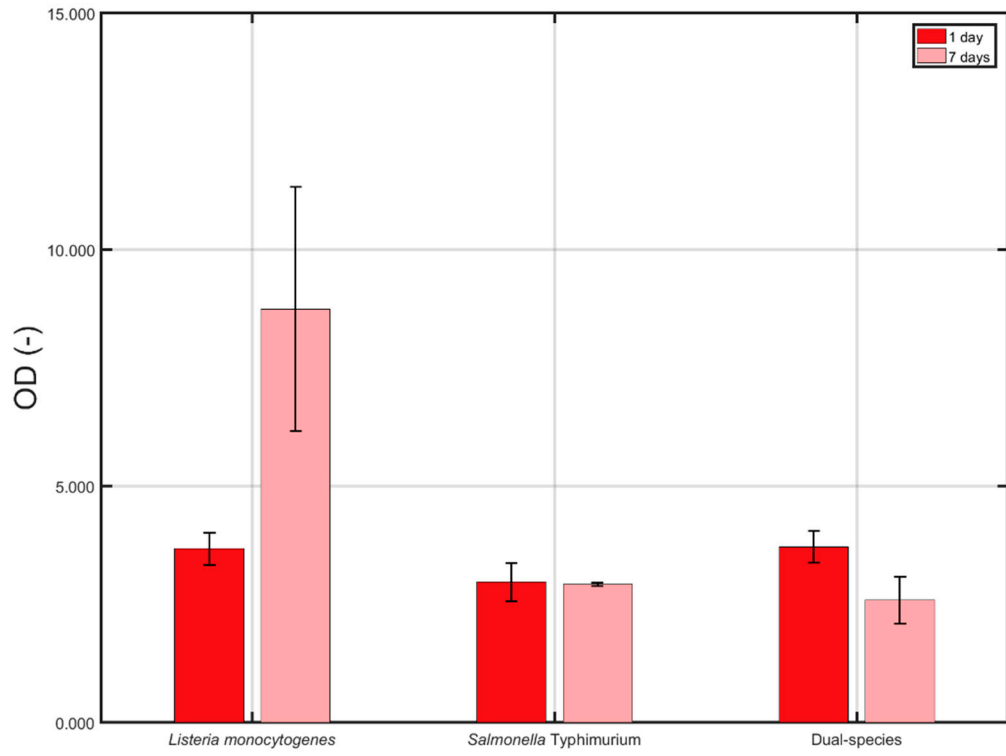

Supplement: foods-09-00157-s001.pdf [file foods-09-00157-s001.pdf]
